# Supplementary material
Source: publisher figshare collection journal article supplement (https://acs.figshare.com/ndownloader/files/3617280)
Supplement: Supplementary file 1 [file 3617280]

data_global 
# 1. SUBMISSION DETAILS
_publ_contact_letter
;
     Please consider this CIF submission for publication 
     in Organometallics
; 
_publ_contact_author                          
;
Michel Etienne
;
_publ_contact_author_address 
;
Laboratoire de Chimie de Coordination
205 Route de Narbonne
31077 Toulouse Cedex 04
;
_publ_contact_author_email                    
'michel.etienne@lcc-toulouse.fr'

_publ_requested_journal  'Organometallics'

#=============================================================================
# 2. TITLE AND AUTHOR LIST
_publ_section_title
;beta-Abstraction / 1,3-CH bond addition as a mechanism for the activation of 
CH bonds at early transition metal centers
;
loop_
_publ_author_name
_publ_author_address
'Yimu Hu'
;
Laboratoire de Chimie de Coordination
UPR-CNRS 8241
205, route de Narbonne
31077 Toulouse cedex, France 
;
'Nuria Romero'
;
Laboratoire de Chimie de Coordination
UPR-CNRS 8241
205, route de Narbonne
31077 Toulouse cedex, France 
;
'Chiara Dinoi'
;
Laboratoire de Chimie de Coordination
UPR-CNRS 8241
205, route de Narbonne
31077 Toulouse cedex, France 
;
'Laure Vendier'
;
Laboratoire de Chimie de Coordination
UPR-CNRS 8241
205, route de Narbonne
31077 Toulouse cedex, France 
;
'Sonia Mallet-Ladeira'
;
Laboratoire de Chimie de Coordination
UPR-CNRS 8241
205, route de Narbonne
31077 Toulouse cedex, France 
;
'John E. McGrady'
;
Department of Chemistry
Inorganic Chemistry Laboratory
University of Oxford
South Parks Road
Oxford OX1 3QR, United Kingdom
;
'Abel Locati'
;
Institute of Chemical Research of Catalonia (ICIQ)
Av. Paisos Catalans, 16
43007 Tarragona, Spain
;
'Feliu Maserase'
;
Institute of Chemical Research of Catalonia (ICIQ)
Av. Paisos Catalans, 16
43007 Tarragona, Spain
Departament de Qu\'imica
Universitat Aut\`onoma de Barcelona
08193 Bellaterra, Spain
;
#==============================================================================
_publ_section_references 
;
Altomare, A., Cascarano, G., Giacovazzo, G., Guagliardi, A., Burla, M.C., 
Polidori, G. and Camalli, M. (1994)., SIR92 program for automatic
solution of crystal structures by direct methods. J. Appl. Cryst. 27, 435.

Sheldrick, G. M. (1997). SHELXL97. Program for the refinement
of Crystal Structures. University of Gottingen, Germany.  

MULTI SCAN - c.f. r.h. blessing, acta cryst. (1995), a51, 33-38
     
WINGX - 1.63 Integrated System 
of Windows Programs 
for the Solution, Refinement and Analysis 
of Single Crystal X-Ray Diffraction Data. 
Farrugia, L. J. Appl. Crystallogr., 1999, 32, 837.

ORTEP3 for Windows, Farrugia, L. J. J. Appl. Crystallogr. 1997, 30, 565.;
; 
 
#------------------  SECTION 2. COMPOUND(S) DETAILS -------------------------#
 
data_yh037
 
_audit_creation_date                    2013-03-28T11:20:13-00:00
_audit_creation_method                  'WinGX routine CIF_UPDATE'
 
#----------------------------------------------------------------------------#
#                   CHEMICAL INFORMATION                                     #
#----------------------------------------------------------------------------#
 
_chemical_name_systematic
;
 ?
;
_chemical_formula_moiety                'C17 H18 S Zr'
_chemical_formula_sum                   'C17 H18 S Zr'
_chemical_formula_weight                345.59
_chemical_compound_source               'synthesis as described'
 
#----------------------------------------------------------------------------#
#                   UNIT CELL INFORMATION                                    #
#----------------------------------------------------------------------------#
 
_symmetry_cell_setting                  monoclinic
_symmetry_space_group_name_H-M          'P 1 21/c 1'
_symmetry_space_group_name_Hall         '-P 2ybc'
_symmetry_Int_Tables_number             14
loop_
    _symmetry_equiv_pos_as_xyz
'x, y, z'
'-x, y+1/2, -z+1/2'
'-x, -y, -z'
'x, -y-1/2, z-1/2'
 
_cell_length_a                          13.0228(6)
_cell_length_b                          8.2073(4)
_cell_length_c                          14.8470(7)
_cell_angle_alpha                       90
_cell_angle_beta                        111.593(2)
_cell_angle_gamma                       90
_cell_volume                            1475.51(12)
_cell_formula_units_Z                   4
_cell_measurement_temperature           180(2)
_cell_measurement_reflns_used           9949
_cell_measurement_theta_min             2.81
_cell_measurement_theta_max             31.89
_cell_measurement_wavelength            0.71073
 
#----------------------------------------------------------------------------#
#                   CRYSTAL INFORMATION                                      #
#----------------------------------------------------------------------------#
 
_exptl_crystal_description              block
_exptl_crystal_colour                   colourless
_exptl_crystal_size_max                 0.15
_exptl_crystal_size_mid                 0.1
_exptl_crystal_size_min                 0.05
_exptl_crystal_density_diffrn           1.556
_exptl_crystal_density_method           'not measured'
_exptl_crystal_F_000                    704
_exptl_special_details
;
 ?
;
 
#----------------------------------------------------------------------------#
#                   ABSORPTION CORRECTION                                    #
#----------------------------------------------------------------------------#
 
_exptl_absorpt_coefficient_mu           0.87
_exptl_absorpt_correction_type          multi-scan
_exptl_absorpt_process_details
;
        [c.f. r.h. blessing, acta cryst. (1995), a51, 33-38]
;
_exptl_absorpt_correction_T_min         0.7864
_exptl_absorpt_correction_T_max         0.8952
#----------------------------------------------------------------------------#
#                   DATA COLLECTION                                          #
#----------------------------------------------------------------------------#
 
_diffrn_ambient_temperature             180(2)
_diffrn_radiation_type            MoK\a
_diffrn_radiation_wavelength  0.71073
_diffrn_radiation_source          'fine-focus sealed tube'
_diffrn_radiation_monochromator   graphite
_diffrn_measurement_device_type   'Bruker Kappa APEX II'
_diffrn_measurement_method        \w-\f
_diffrn_standards_number          0
_diffrn_standards_interval_count  0
_diffrn_standards_interval_time   0
_diffrn_standards_decay_%         0
_diffrn_reflns_av_R_equivalents         0.0316
_diffrn_reflns_av_unetI/netI            0.0218
_diffrn_reflns_number                   40404
_diffrn_reflns_limit_h_min              -19
_diffrn_reflns_limit_h_max              19
_diffrn_reflns_limit_k_min              -12
_diffrn_reflns_limit_k_max              12
_diffrn_reflns_limit_l_min              -22
_diffrn_reflns_limit_l_max              22
_diffrn_reflns_theta_min                2.81
_diffrn_reflns_theta_max                32.21
_diffrn_reflns_theta_full               32.21
_diffrn_measured_fraction_theta_full
                                        0.975
_diffrn_measured_fraction_theta_max
                                        0.975
_reflns_number_total                    5089
_reflns_number_gt                       4271
_reflns_threshold_expression            >2\s(I)
 
#----------------------------------------------------------------------------#
#                   COMPUTER PROGRAMS USED                                   #
#----------------------------------------------------------------------------#
 
_computing_data_collection              'Bruker APEX2'
_computing_cell_refinement              'Bruker SAINT'
_computing_data_reduction               'Bruker SAINT'
_computing_structure_solution           'SHELXS-97 (Sheldrick, 2008)'
_computing_structure_refinement         'SHELXL-97 (Sheldrick, 2008)'
_computing_molecular_graphics           'Ortep-3 for Windows (Farrugia, 1997)'
_computing_publication_material
                                   'WinGX publication routines (Farrugia, 1999)'
 
#----------------------------------------------------------------------------#
#                   STRUCTURE SOLUTION
#----------------------------------------------------------------------------#
 
_atom_sites_solution_primary            direct
_atom_sites_solution_secondary          difmap
_atom_sites_solution_hydrogens          geom
 
#----------------------------------------------------------------------------#
#                   REFINEMENT INFORMATION                                   #
#----------------------------------------------------------------------------#
 
_refine_special_details
;
 Refinement of F^2^ against ALL reflections.  The weighted R-factor wR and
 goodness of fit S are based on F^2^, conventional R-factors R are based
 on F, with F set to zero for negative F^2^. The threshold expression of
 F^2^ > 2\s(F^2^) is used only for calculating R-factors(gt) etc. and is
 not relevant to the choice of reflections for refinement.  R-factors based
 on F^2^ are statistically about twice as large as those based on F, and R-
 factors based on ALL data will be even larger.
;
_refine_ls_structure_factor_coef        Fsqd
_refine_ls_matrix_type                  full
_refine_ls_weighting_scheme             calc
_refine_ls_weighting_details
         'calc w=1/[\s^2^(Fo^2^)+(0.0322P)^2^+1.1042P] where P=(Fo^2^+2Fc^2^)/3'
_refine_ls_hydrogen_treatment           constr
_refine_ls_extinction_method            none
_refine_ls_number_reflns                5089
_refine_ls_number_parameters            172
_refine_ls_number_restraints            0
_refine_ls_R_factor_all                 0.0384
_refine_ls_R_factor_gt                  0.0289
_refine_ls_wR_factor_ref                0.0738
_refine_ls_wR_factor_gt                 0.0688
_refine_ls_goodness_of_fit_ref          1.035
_refine_ls_restrained_S_all             1.035
_refine_ls_shift/su_max                 0.002
_refine_ls_shift/su_mean                0
_refine_diff_density_max                0.563
_refine_diff_density_min                -0.798
_refine_diff_density_rms                0.079
 
#----------------------------------------------------------------------------#
#                   ATOMIC TYPES, COORDINATES AND THERMAL PARAMETERS         #
#----------------------------------------------------------------------------#
 
loop_
    _atom_type_symbol
    _atom_type_description
    _atom_type_scat_dispersion_real
    _atom_type_scat_dispersion_imag
    _atom_type_scat_source
C C 0.0033 0.0016 'International Tables Vol C Tables 4.2.6.8 and 6.1.1.4'
H H 0 0 'International Tables Vol C Tables 4.2.6.8 and 6.1.1.4'
Zr Zr -2.9673 0.5597 'International Tables Vol C Tables 4.2.6.8 and 6.1.1.4'
S S 0.1246 0.1234 'International Tables Vol C Tables 4.2.6.8 and 6.1.1.4'
 
loop_
    _atom_site_label
    _atom_site_type_symbol
    _atom_site_fract_x
    _atom_site_fract_y
    _atom_site_fract_z
    _atom_site_U_iso_or_equiv
    _atom_site_adp_type
    _atom_site_occupancy
    _atom_site_symmetry_multiplicity
    _atom_site_calc_flag
    _atom_site_refinement_flags
    _atom_site_disorder_assembly
    _atom_site_disorder_group
C1 C 0.25086(15) -0.0112(2) 0.43691(12) 0.0261(3) Uani 1 1 d . . .
C2 C 0.23934(16) -0.1817(2) 0.44209(13) 0.0306(4) Uani 1 1 d . . .
H2 H 0.2684 -0.2569 0.409 0.037 Uiso 1 1 calc R . .
C3 C 0.1801(2) -0.2311(3) 0.50174(15) 0.0415(5) Uani 1 1 d . . .
H3 H 0.1646 -0.3416 0.511 0.05 Uiso 1 1 calc R . .
C4 C 0.1484(2) -0.1046(3) 0.54342(18) 0.0501(6) Uani 1 1 d . . .
H4 H 0.1083 -0.1145 0.5853 0.06 Uiso 1 1 calc R . .
C5 C 0.13964(15) 0.1169(2) 0.19770(14) 0.0304(4) Uani 1 1 d . . .
H5 H 0.1346 0.1876 0.1414 0.036 Uiso 1 1 calc R . .
C6 C 0.03447(16) 0.1023(3) 0.21848(17) 0.0407(5) Uani 1 1 d . . .
H6A H 0.0417 0.0906 0.2869 0.049 Uiso 1 1 calc R . .
H6B H -0.0306 0.1657 0.1773 0.049 Uiso 1 1 calc R . .
C7 C 0.07096(16) -0.0370(3) 0.17284(17) 0.0391(5) Uani 1 1 d . . .
H7A H 0.0284 -0.0597 0.1036 0.047 Uiso 1 1 calc R . .
H7B H 0.1006 -0.1348 0.2131 0.047 Uiso 1 1 calc R . .
C8 C 0.22554(19) 0.4235(2) 0.29851(17) 0.0390(5) Uani 1 1 d . . .
H8 H 0.1581 0.4601 0.2435 0.047 Uiso 1 1 calc R . .
C9 C 0.22955(17) 0.3816(2) 0.39102(17) 0.0341(4) Uani 1 1 d . . .
H9 H 0.1656 0.3828 0.413 0.041 Uiso 1 1 calc R . .
C10 C 0.34143(18) 0.3610(2) 0.45124(16) 0.0362(4) Uani 1 1 d . . .
H10 H 0.3703 0.3463 0.5231 0.043 Uiso 1 1 calc R . .
C11 C 0.40543(18) 0.3902(3) 0.39476(19) 0.0423(5) Uani 1 1 d . . .
H11 H 0.4877 0.401 0.4199 0.051 Uiso 1 1 calc R . .
C12 C 0.3334(2) 0.4275(3) 0.29984(19) 0.0433(5) Uani 1 1 d . . .
H12 H 0.356 0.4699 0.2467 0.052 Uiso 1 1 calc R . .
C13 C 0.35162(17) -0.1311(2) 0.26986(16) 0.0349(4) Uani 1 1 d . . .
H13 H 0.3056 -0.2322 0.2537 0.042 Uiso 1 1 calc R . .
C14 C 0.43569(19) -0.0961(3) 0.35998(16) 0.0423(5) Uani 1 1 d . . .
H14 H 0.4592 -0.1683 0.4183 0.051 Uiso 1 1 calc R . .
C15 C 0.49026(16) 0.0451(3) 0.34928(16) 0.0423(5) Uani 1 1 d . . .
H15 H 0.56 0.0895 0.3982 0.051 Uiso 1 1 calc R . .
C16 C 0.44069(17) 0.0970(3) 0.25242(17) 0.0397(5) Uani 1 1 d . . .
H16 H 0.4696 0.1844 0.2211 0.048 Uiso 1 1 calc R . .
C17 C 0.35599(16) -0.0130(3) 0.20394(14) 0.0339(4) Uani 1 1 d . . .
H17 H 0.3135 -0.0155 0.1325 0.041 Uiso 1 1 calc R . .
Zr1 Zr 0.298745(12) 0.134947(18) 0.326848(11) 0.01953(5) Uani 1 1 d . . .
S1 S 0.18993(6) 0.07530(8) 0.51075(5) 0.04937(16) Uani 1 1 d . . .
 
loop_
    _atom_site_aniso_label
    _atom_site_aniso_U_11
    _atom_site_aniso_U_22
    _atom_site_aniso_U_33
    _atom_site_aniso_U_23
    _atom_site_aniso_U_13
    _atom_site_aniso_U_12
C1 0.0299(8) 0.0261(8) 0.0232(7) 0.0000(6) 0.0109(7) 0.0037(6)
C2 0.0384(10) 0.0266(8) 0.0257(8) 0.0031(7) 0.0105(7) -0.0055(7)
C3 0.0534(13) 0.0378(11) 0.0337(10) 0.0082(8) 0.0166(10) -0.0056(9)
C4 0.0665(16) 0.0548(15) 0.0414(12) 0.0071(10) 0.0347(12) -0.0044(12)
C5 0.0242(8) 0.0327(10) 0.0302(8) 0.0023(7) 0.0053(7) -0.0027(7)
C6 0.0208(8) 0.0551(13) 0.0410(11) -0.0084(9) 0.0052(8) 0.0000(8)
C7 0.0271(9) 0.0415(11) 0.0459(11) -0.0111(9) 0.0101(9) -0.0093(8)
C8 0.0426(11) 0.0171(8) 0.0514(12) 0.0040(8) 0.0101(10) 0.0025(7)
C9 0.0349(10) 0.0179(8) 0.0524(12) -0.0070(7) 0.0195(9) 0.0027(7)
C10 0.0402(11) 0.0267(9) 0.0383(10) -0.0133(8) 0.0104(9) -0.0026(8)
C11 0.0319(10) 0.0307(10) 0.0633(14) -0.0186(9) 0.0162(10) -0.0135(8)
C12 0.0559(13) 0.0238(9) 0.0580(13) -0.0004(9) 0.0300(12) -0.0107(9)
C13 0.0362(10) 0.0278(9) 0.0476(11) -0.0094(8) 0.0235(9) 0.0054(7)
C14 0.0419(11) 0.0488(12) 0.0403(10) 0.0046(9) 0.0198(9) 0.0278(10)
C15 0.0198(8) 0.0628(15) 0.0430(11) -0.0185(10) 0.0099(8) 0.0052(8)
C16 0.0329(10) 0.0483(12) 0.0497(12) -0.0115(10) 0.0292(10) -0.0092(9)
C17 0.0327(9) 0.0436(11) 0.0307(9) -0.0101(8) 0.0180(8) -0.0027(8)
Zr1 0.01745(7) 0.01815(8) 0.02330(8) -0.00151(5) 0.00788(6) -0.00080(5)
S1 0.0759(4) 0.0399(3) 0.0512(3) 0.0001(2) 0.0455(3) 0.0047(3)
 
 
#----------------------------------------------------------------------------#
#                   MOLECULAR GEOMETRY                                       #
#----------------------------------------------------------------------------#
 
_geom_special_details
;
 All s.u.'s (except the s.u. in the dihedral angle between two l.s. planes)
 are estimated using the full covariance matrix.  The cell s.u.'s are taken
 into account individually in the estimation of s.u.'s in distances, angles
 and torsion angles; correlations between s.u.'s in cell parameters are only
 used when they are defined by crystal symmetry.  An approximate (isotropic)
 treatment of cell s.u.'s is used for estimating s.u.'s involving l.s. planes.
;
loop_
    _geom_bond_atom_site_label_1
    _geom_bond_atom_site_label_2
    _geom_bond_distance
    _geom_bond_site_symmetry_2
    _geom_bond_publ_flag
C1 C2 1.412(3) . ?
C1 S1 1.7252(18) . ?
C1 Zr1 2.2909(18) . ?
C2 C3 1.431(3) . ?
C2 H2 0.95 . ?
C3 C4 1.348(3) . ?
C3 H3 0.95 . ?
C4 S1 1.704(3) . ?
C4 H4 0.95 . ?
C5 C7 1.513(3) . ?
C5 C6 1.515(3) . ?
C5 Zr1 2.2511(18) . ?
C5 H5 1 . ?
C6 C7 1.493(3) . ?
C6 H6A 0.99 . ?
C6 H6B 0.99 . ?
C7 H7A 0.99 . ?
C7 H7B 0.99 . ?
C8 C12 1.397(3) . ?
C8 C9 1.398(3) . ?
C8 Zr1 2.5301(19) . ?
C8 H8 1 . ?
C9 C10 1.411(3) . ?
C9 Zr1 2.5396(18) . ?
C9 H9 1 . ?
C10 C11 1.403(3) . ?
C10 Zr1 2.5312(18) . ?
C10 H10 1 . ?
C11 C12 1.410(4) . ?
C11 Zr1 2.5111(19) . ?
C11 H11 1 . ?
C12 Zr1 2.503(2) . ?
C12 H12 1 . ?
C13 C17 1.394(3) . ?
C13 C14 1.412(3) . ?
C13 Zr1 2.5274(18) . ?
C13 H13 1 . ?
C14 C15 1.398(4) . ?
C14 Zr1 2.5243(19) . ?
C14 H14 1 . ?
C15 C16 1.408(3) . ?
C15 Zr1 2.5028(19) . ?
C15 H15 1 . ?
C16 C17 1.402(3) . ?
C16 Zr1 2.4977(19) . ?
C16 H16 1 . ?
C17 Zr1 2.5222(18) . ?
C17 H17 1 . ?
 
loop_
    _geom_angle_atom_site_label_1
    _geom_angle_atom_site_label_2
    _geom_angle_atom_site_label_3
    _geom_angle
    _geom_angle_site_symmetry_1
    _geom_angle_site_symmetry_3
    _geom_angle_publ_flag
C2 C1 S1 106.87(14) . . ?
C2 C1 Zr1 128.31(13) . . ?
S1 C1 Zr1 123.18(9) . . ?
C1 C2 C3 113.98(19) . . ?
C1 C2 H2 123 . . ?
C3 C2 H2 123 . . ?
C4 C3 C2 113.1(2) . . ?
C4 C3 H3 123.5 . . ?
C2 C3 H3 123.5 . . ?
C3 C4 S1 110.70(17) . . ?
C3 C4 H4 124.7 . . ?
S1 C4 H4 124.7 . . ?
C7 C5 C6 59.10(13) . . ?
C7 C5 Zr1 122.61(14) . . ?
C6 C5 Zr1 116.70(14) . . ?
C7 C5 H5 115.5 . . ?
C6 C5 H5 115.5 . . ?
Zr1 C5 H5 115.5 . . ?
C7 C6 C5 60.37(13) . . ?
C7 C6 H6A 117.7 . . ?
C5 C6 H6A 117.7 . . ?
C7 C6 H6B 117.7 . . ?
C5 C6 H6B 117.7 . . ?
H6A C6 H6B 114.9 . . ?
C6 C7 C5 60.53(14) . . ?
C6 C7 H7A 117.7 . . ?
C5 C7 H7A 117.7 . . ?
C6 C7 H7B 117.7 . . ?
C5 C7 H7B 117.7 . . ?
H7A C7 H7B 114.8 . . ?
C12 C8 C9 108.5(2) . . ?
C12 C8 Zr1 72.81(12) . . ?
C9 C8 Zr1 74.37(11) . . ?
C12 C8 H8 125.5 . . ?
C9 C8 H8 125.5 . . ?
Zr1 C8 H8 125.5 . . ?
C8 C9 C10 107.96(19) . . ?
C8 C9 Zr1 73.61(11) . . ?
C10 C9 Zr1 73.51(10) . . ?
C8 C9 H9 125.7 . . ?
C10 C9 H9 125.7 . . ?
Zr1 C9 H9 125.7 . . ?
C11 C10 C9 107.6(2) . . ?
C11 C10 Zr1 73.05(11) . . ?
C9 C10 Zr1 74.17(11) . . ?
C11 C10 H10 125.8 . . ?
C9 C10 H10 125.8 . . ?
Zr1 C10 H10 125.8 . . ?
C10 C11 C12 108.13(19) . . ?
C10 C11 Zr1 74.63(11) . . ?
C12 C11 Zr1 73.34(11) . . ?
C10 C11 H11 125.6 . . ?
C12 C11 H11 125.6 . . ?
Zr1 C11 H11 125.6 . . ?
C8 C12 C11 107.8(2) . . ?
C8 C12 Zr1 74.96(11) . . ?
C11 C12 Zr1 74.00(12) . . ?
C8 C12 H12 125.6 . . ?
C11 C12 H12 125.6 . . ?
Zr1 C12 H12 125.6 . . ?
C17 C13 C14 107.81(19) . . ?
C17 C13 Zr1 73.78(11) . . ?
C14 C13 Zr1 73.65(11) . . ?
C17 C13 H13 125.8 . . ?
C14 C13 H13 125.8 . . ?
Zr1 C13 H13 125.8 . . ?
C15 C14 C13 108.1(2) . . ?
C15 C14 Zr1 73.00(12) . . ?
C13 C14 Zr1 73.89(11) . . ?
C15 C14 H14 125.7 . . ?
C13 C14 H14 125.7 . . ?
Zr1 C14 H14 125.7 . . ?
C14 C15 C16 107.80(19) . . ?
C14 C15 Zr1 74.70(11) . . ?
C16 C15 Zr1 73.45(11) . . ?
C14 C15 H15 125.7 . . ?
C16 C15 H15 125.7 . . ?
Zr1 C15 H15 125.7 . . ?
C17 C16 C15 107.9(2) . . ?
C17 C16 Zr1 74.74(11) . . ?
C15 C16 Zr1 73.84(11) . . ?
C17 C16 H16 125.6 . . ?
C15 C16 H16 125.6 . . ?
Zr1 C16 H16 125.6 . . ?
C13 C17 C16 108.38(19) . . ?
C13 C17 Zr1 74.18(10) . . ?
C16 C17 Zr1 72.82(11) . . ?
C13 C17 H17 125.5 . . ?
C16 C17 H17 125.5 . . ?
Zr1 C17 H17 125.5 . . ?
C5 Zr1 C1 99.57(7) . . ?
C5 Zr1 C16 102.36(7) . . ?
C1 Zr1 C16 133.66(7) . . ?
C5 Zr1 C12 95.18(8) . . ?
C1 Zr1 C12 136.81(7) . . ?
C16 Zr1 C12 80.93(8) . . ?
C5 Zr1 C15 130.82(7) . . ?
C1 Zr1 C15 105.68(8) . . ?
C16 Zr1 C15 32.71(8) . . ?
C12 Zr1 C15 94.28(8) . . ?
C5 Zr1 C11 126.64(8) . . ?
C1 Zr1 C11 113.96(8) . . ?
C16 Zr1 C11 83.77(7) . . ?
C12 Zr1 C11 32.66(8) . . ?
C15 Zr1 C11 79.37(8) . . ?
C5 Zr1 C17 77.08(7) . . ?
C1 Zr1 C17 119.63(7) . . ?
C16 Zr1 C17 32.44(7) . . ?
C12 Zr1 C17 103.15(8) . . ?
C15 Zr1 C17 53.77(7) . . ?
C11 Zr1 C17 115.16(7) . . ?
C5 Zr1 C14 118.64(8) . . ?
C1 Zr1 C14 79.98(7) . . ?
C16 Zr1 C14 53.68(8) . . ?
C12 Zr1 C14 126.58(8) . . ?
C15 Zr1 C14 32.30(8) . . ?
C11 Zr1 C14 107.56(8) . . ?
C17 Zr1 C14 53.39(7) . . ?
C5 Zr1 C13 86.37(7) . . ?
C1 Zr1 C13 88.02(7) . . ?
C16 Zr1 C13 53.64(7) . . ?
C12 Zr1 C13 133.48(7) . . ?
C15 Zr1 C13 53.77(7) . . ?
C11 Zr1 C13 132.59(7) . . ?
C17 Zr1 C13 32.04(7) . . ?
C14 Zr1 C13 32.46(7) . . ?
C5 Zr1 C8 75.38(7) . . ?
C1 Zr1 C8 115.09(7) . . ?
C16 Zr1 C8 109.76(8) . . ?
C12 Zr1 C8 32.23(8) . . ?
C15 Zr1 C8 126.45(8) . . ?
C11 Zr1 C8 53.46(7) . . ?
C17 Zr1 C8 121.61(7) . . ?
C14 Zr1 C8 158.68(8) . . ?
C13 Zr1 C8 152.34(8) . . ?
C5 Zr1 C10 123.78(7) . . ?
C1 Zr1 C10 84.71(7) . . ?
C16 Zr1 C10 114.49(7) . . ?
C12 Zr1 C10 53.80(8) . . ?
C15 Zr1 C10 100.28(7) . . ?
C11 Zr1 C10 32.32(8) . . ?
C17 Zr1 C10 146.80(7) . . ?
C14 Zr1 C10 117.31(8) . . ?
C13 Zr1 C10 149.76(7) . . ?
C8 Zr1 C10 53.36(7) . . ?
C5 Zr1 C9 91.70(7) . . ?
C1 Zr1 C9 85.55(6) . . ?
C16 Zr1 C9 133.46(7) . . ?
C12 Zr1 C9 53.49(7) . . ?
C15 Zr1 C9 131.21(7) . . ?
C11 Zr1 C9 53.46(7) . . ?
C17 Zr1 C9 153.56(7) . . ?
C14 Zr1 C9 148.04(7) . . ?
C13 Zr1 C9 172.89(7) . . ?
C8 Zr1 C9 32.02(7) . . ?
C10 Zr1 C9 32.32(7) . . ?
C4 S1 C1 95.32(11) . . ?
 
# The following lines are used to test the character set of files sent by
# network email or other means. They are not part of the CIF data set
# abcdefghijklmnopqrstuvwxyzABCDEFGHIJKLMNOPQRSTUVWXYZ0123456789
# !@#$%^&*()_+{}:"~<>?|\-=[];'`,./
 
# END of CIF


data_nuria281013m
 
#----------------------------------------------------------------------------#
#                   CHEMICAL INFORMATION                                     #
#----------------------------------------------------------------------------#
 
_chemical_name_systematic
;
 ?
;
_chemical_formula_moiety                'C16 H20 Zr'
_chemical_formula_sum                   'C16 H20 Zr'
_chemical_formula_weight                303.54
_chemical_compound_source               'synthesis as described'
 
#----------------------------------------------------------------------------#
#                   UNIT CELL INFORMATION                                    #
#----------------------------------------------------------------------------#
 
_symmetry_cell_setting                  trigonal
_symmetry_space_group_name_H-M          'P -3'
_symmetry_space_group_name_Hall         '-P 3'
_symmetry_Int_Tables_number             147
loop_
    _symmetry_equiv_pos_as_xyz
'x, y, z'
'-y, x-y, z'
'-x+y, -x, z'
'-x, -y, -z'
'y, -x+y, -z'
'x-y, x, -z'
 
_cell_length_a                          23.4826(6)
_cell_length_b                          23.4826(6)
_cell_length_c                          13.0911(4)
_cell_angle_alpha                       90
_cell_angle_beta                        90
_cell_angle_gamma                       120
_cell_volume                            6251.7(4)
_cell_formula_units_Z                   18
_cell_measurement_temperature           180(2)
_cell_measurement_reflns_used           9853
_cell_measurement_theta_min             2.33
_cell_measurement_theta_max             30.49
_cell_measurement_wavelength            0.71073
 
#----------------------------------------------------------------------------#
#                   CRYSTAL INFORMATION                                      #
#----------------------------------------------------------------------------#
 
_exptl_crystal_description              plate
_exptl_crystal_colour                   colourless
_exptl_crystal_size_max                 0.32
_exptl_crystal_size_mid                 0.18
_exptl_crystal_size_min                 0.04
_exptl_crystal_density_diffrn           1.451
_exptl_crystal_density_method           'not measured'
_exptl_crystal_F_000                    2808
_exptl_special_details
;
 ?
;
 
#----------------------------------------------------------------------------#
#                   ABSORPTION CORRECTION                                    #
#----------------------------------------------------------------------------#
 
_exptl_absorpt_coefficient_mu           0.768
_exptl_absorpt_correction_type          multi-scan
_exptl_absorpt_process_details
;
        [c.f. r.h. blessing, acta cryst. (1995), a51, 33-38]
;
_exptl_absorpt_correction_T_min         0.847
_exptl_absorpt_correction_T_max         0.970
 
#----------------------------------------------------------------------------#
#                   DATA COLLECTION                                          #
#----------------------------------------------------------------------------#
 
_diffrn_ambient_temperature             180(2)
_diffrn_radiation_wavelength            0.71073
_diffrn_radiation_type                  MoK\a
_diffrn_radiation_source          'microfocus sealed tube'
_diffrn_radiation_monochromator   'multilayer optics'
_diffrn_measurement_device_type   'Bruker Kappa APEX II Quazar'
_diffrn_measurement_method        'phi and omega scans'
_diffrn_standards_number          0
_diffrn_standards_interval_count  0
_diffrn_standards_interval_time   0
_diffrn_standards_decay_%         0
_diffrn_radiation_probe                 x-ray
_diffrn_reflns_av_unetI/netI            0.0102
_diffrn_reflns_number                   209356
_diffrn_reflns_av_R_equivalents   0.0303 
_diffrn_reflns_limit_h_min              -28
_diffrn_reflns_limit_h_max              28
_diffrn_reflns_limit_k_min              -28
_diffrn_reflns_limit_k_max              28
_diffrn_reflns_limit_l_min              0
_diffrn_reflns_limit_l_max              15
_diffrn_reflns_theta_min                1
_diffrn_reflns_theta_max                25.34
_diffrn_reflns_theta_full               25.34
_diffrn_measured_fraction_theta_full
                                        0.999
_diffrn_measured_fraction_theta_max
                                        0.999
_reflns_number_total                    7654
_reflns_number_gt                       7256
_reflns_threshold_expression            >2sigma(I)
 
#----------------------------------------------------------------------------#
#                   COMPUTER PROGRAMS USED                                   #
#----------------------------------------------------------------------------#
 
_computing_data_collection      'APEX2 (Bruker, 2006)'
_computing_cell_refinement      'APEX2 and SAINT (Bruker, 2006)'
_computing_data_reduction       'SAINT (Bruker, 2006)'   
_computing_structure_solution           'SHELXS-97 (Sheldrick, 2008)'
_computing_structure_refinement         'SHELXL-97 (Sheldrick, 2008)'
_computing_molecular_graphics           'Ortep-3 for Windows (Farrugia, 1997)'
_computing_publication_material
                                   'WinGX publication routines (Farrugia, 1999)'
 
#----------------------------------------------------------------------------#
#                   STRUCTURE SOLUTION
#----------------------------------------------------------------------------#
 
_atom_sites_solution_primary            direct
_atom_sites_solution_secondary          difmap
_atom_sites_solution_hydrogens          geom
 
#----------------------------------------------------------------------------#
#                   REFINEMENT INFORMATION                                   #
#----------------------------------------------------------------------------#
 
_refine_special_details
;
 Refinement of F^2^ against ALL reflections.  The weighted R-factor wR and
 goodness of fit S are based on F^2^, conventional R-factors R are based
 on F, with F set to zero for negative F^2^. The threshold expression of
 F^2^ > 2sigma(F^2^) is used only for calculating R-factors(gt) etc. and is
 not relevant to the choice of reflections for refinement.  R-factors based
 on F^2^ are statistically about twice as large as those based on F, and R-
 factors based on ALL data will be even larger.
;
_refine_ls_structure_factor_coef        Fsqd
_refine_ls_matrix_type                  full
_refine_ls_weighting_scheme             calc
_refine_ls_weighting_details
         'calc w=1/[\s^2^(Fo^2^)+(0.0342P)^2^+3.5517P] where P=(Fo^2^+2Fc^2^)/3'
_refine_ls_hydrogen_treatment           constr
_refine_ls_extinction_method            none
_refine_ls_number_reflns                7654
_refine_ls_number_parameters            533
_refine_ls_number_restraints            270
_refine_ls_R_factor_all                 0.0283
_refine_ls_R_factor_gt                  0.0254
_refine_ls_wR_factor_ref                0.0678
_refine_ls_wR_factor_gt                 0.065
_refine_ls_goodness_of_fit_ref          1.066
_refine_ls_restrained_S_all             1.056
_refine_ls_shift/su_max                 0.007
_refine_ls_shift/su_mean                0
_refine_diff_density_max                1.353
_refine_diff_density_min                -0.308
_refine_diff_density_rms                0.065
 
#----------------------------------------------------------------------------#
#                   ATOMIC TYPES, COORDINATES AND THERMAL PARAMETERS         #
#----------------------------------------------------------------------------#
 
loop_
    _atom_type_symbol
    _atom_type_description
    _atom_type_scat_dispersion_real
    _atom_type_scat_dispersion_imag
    _atom_type_scat_source
C C 0.0033 0.0016 'International Tables Vol C Tables 4.2.6.8 and 6.1.1.4'
H H 0 0 'International Tables Vol C Tables 4.2.6.8 and 6.1.1.4'
Zr Zr -2.9673 0.5597 'International Tables Vol C Tables 4.2.6.8 and 6.1.1.4'
 
loop_
    _atom_site_label
    _atom_site_type_symbol
    _atom_site_fract_x
    _atom_site_fract_y
    _atom_site_fract_z
    _atom_site_U_iso_or_equiv
    _atom_site_adp_type
    _atom_site_occupancy
    _atom_site_symmetry_multiplicity
    _atom_site_calc_flag
    _atom_site_refinement_flags
    _atom_site_disorder_assembly
    _atom_site_disorder_group
C17 C 0.4644(5) 0.4684(6) 0.3521(8) 0.036(2) Uani 0.42 1 d PDU A 1
H17 H 0.4782 0.4764 0.4214 0.043 Uiso 0.42 1 calc PR A 1
C18 C 0.3986(6) 0.4326(10) 0.3181(10) 0.036(2) Uani 0.42 1 d PDU A 1
H18 H 0.3604 0.4107 0.3596 0.043 Uiso 0.42 1 calc PR A 1
C19 C 0.4007(6) 0.4360(12) 0.2095(11) 0.035(2) Uani 0.42 1 d PDU A 1
H19 H 0.3638 0.4188 0.1649 0.042 Uiso 0.42 1 calc PR A 1
C20 C 0.4670(6) 0.4695(7) 0.1803(9) 0.036(2) Uani 0.42 1 d PDU A 1
H20 H 0.4826 0.4768 0.1119 0.043 Uiso 0.42 1 calc PR A 1
C21 C 0.5063(5) 0.4901(6) 0.2667(9) 0.034(2) Uani 0.42 1 d PDU A 1
H21 H 0.553 0.5144 0.268 0.04 Uiso 0.42 1 calc PR A 1
C17' C 0.4415(3) 0.4590(4) 0.3674(6) 0.0310(15) Uani 0.58 1 d PDU A 2
H17' H 0.4394 0.4581 0.4399 0.037 Uiso 0.58 1 calc PR A 2
C18' C 0.3871(4) 0.4308(7) 0.2999(7) 0.0328(16) Uani 0.58 1 d PDU A 2
H18' H 0.342 0.4092 0.3186 0.039 Uiso 0.58 1 calc PR A 2
C19' C 0.4127(4) 0.4408(9) 0.1988(8) 0.0371(18) Uani 0.58 1 d PDU A 2
H19' H 0.3875 0.4253 0.1379 0.045 Uiso 0.58 1 calc PR A 2
C20' C 0.4812(4) 0.4774(5) 0.2050(7) 0.0373(17) Uani 0.58 1 d PDU A 2
H20' H 0.5105 0.4922 0.1485 0.045 Uiso 0.58 1 calc PR A 2
C21' C 0.4994(4) 0.4886(4) 0.3079(6) 0.0312(16) Uani 0.58 1 d PDU A 2
H21' H 0.5431 0.5121 0.3334 0.037 Uiso 0.58 1 calc PR A 2
C23 C 0.32599(14) 0.52417(16) 0.3128(3) 0.0432(8) Uani 1 1 d . A .
H23 H 0.3021 0.4893 0.3596 0.052 Uiso 1 1 calc R . .
C24 C 0.32725(13) 0.51840(14) 0.2059(3) 0.0390(8) Uani 1 1 d . A .
H24 H 0.3042 0.4789 0.1675 0.047 Uiso 1 1 calc R . .
C25 C 0.36854(14) 0.58138(15) 0.1662(3) 0.0379(7) Uani 1 1 d . A .
H25 H 0.3785 0.592 0.0961 0.045 Uiso 1 1 calc R . .
C26 C 0.39225(14) 0.62546(15) 0.2464(3) 0.0399(10) Uani 1 1 d . . .
H26 H 0.4212 0.6715 0.2407 0.048 Uiso 1 1 calc R . .
C22 C 0.36631(15) 0.59063(17) 0.3373(3) 0.0437(9) Uani 1 1 d . A .
H22 H 0.3746 0.6089 0.4041 0.052 Uiso 1 1 calc R . .
C27 C 0.51875(14) 0.61617(14) 0.1560(2) 0.0356(6) Uani 1 1 d . A .
H27 H 0.5621 0.6227 0.1798 0.043 Uiso 1 1 calc R . .
C28 C 0.51833(19) 0.61679(18) 0.0416(3) 0.0597(10) Uani 1 1 d . . .
H28A H 0.556 0.6179 0.0058 0.072 Uiso 1 1 calc R . .
H28B H 0.4754 0.5908 0.0068 0.072 Uiso 1 1 calc R . .
C29 C 0.53041(16) 0.67678(15) 0.0968(3) 0.0470(9) Uani 1 1 d . . .
H29A H 0.495 0.6879 0.0968 0.056 Uiso 1 1 calc R . .
H29B H 0.5756 0.715 0.0958 0.056 Uiso 1 1 calc R . .
C30 C 0.49416(13) 0.60653(13) 0.4116(2) 0.0314(6) Uani 1 1 d . A .
H30 H 0.4719 0.5864 0.4777 0.038 Uiso 1 1 calc R . .
C31 C 0.53064(13) 0.68094(13) 0.4076(3) 0.0384(7) Uani 1 1 d . . .
H31A H 0.5313 0.702 0.3418 0.046 Uiso 1 1 calc R . .
H31B H 0.529 0.7047 0.4689 0.046 Uiso 1 1 calc R . .
C32 C 0.56933(14) 0.64609(14) 0.4147(3) 0.0429(8) Uani 1 1 d . . .
H32A H 0.5912 0.6483 0.4804 0.051 Uiso 1 1 calc R . .
H32B H 0.5935 0.6455 0.3532 0.051 Uiso 1 1 calc R . .
C2 C 0.15280(14) 0.14689(13) 0.1556(2) 0.0323(6) Uani 1 1 d . . .
H2 H 0.1945 0.1672 0.1228 0.039 Uiso 1 1 calc R . .
C3 C 0.14116(15) 0.13050(13) 0.2589(2) 0.0354(7) Uani 1 1 d . . .
H3 H 0.1736 0.1379 0.3087 0.042 Uiso 1 1 calc R . .
C4 C 0.07280(15) 0.10091(13) 0.2765(3) 0.0406(7) Uani 1 1 d . . .
H4 H 0.0509 0.0843 0.3398 0.049 Uiso 1 1 calc R . .
C5 C 0.04373(13) 0.10063(12) 0.1840(3) 0.0348(7) Uani 1 1 d . . .
H5 H -0.0019 0.0843 0.1735 0.042 Uiso 1 1 calc R . .
C1 C 0.09242(13) 0.12826(13) 0.1088(2) 0.0339(6) Uani 1 1 d . . .
H1 H 0.0857 0.1335 0.0387 0.041 Uiso 1 1 calc R . .
C8 C 0.22612(15) 0.28640(15) 0.3113(3) 0.0438(9) Uani 1 1 d . . .
H8 H 0.2436 0.263 0.3461 0.053 Uiso 1 1 calc R . .
C7 C 0.23342(14) 0.30259(14) 0.2075(3) 0.0450(9) Uani 1 1 d . . .
H7 H 0.2573 0.2924 0.1592 0.054 Uiso 1 1 calc R . .
C6 C 0.19977(16) 0.33613(14) 0.1868(4) 0.0522(10) Uani 1 1 d . . .
H6 H 0.1964 0.3526 0.1222 0.063 Uiso 1 1 calc R . .
C10 C 0.17201(17) 0.34127(15) 0.2776(4) 0.0590(11) Uani 1 1 d . . .
H10 H 0.1463 0.3618 0.2859 0.071 Uiso 1 1 calc R . .
C9 C 0.18856(16) 0.31098(17) 0.3543(3) 0.0552(10) Uani 1 1 d . . .
H9 H 0.1763 0.3077 0.4241 0.066 Uiso 1 1 calc R . .
C14 C 0.06462(14) 0.24280(14) 0.1049(2) 0.0363(7) Uani 1 1 d . . .
H14 H 0.088 0.2537 0.0378 0.044 Uiso 1 1 calc R . .
C16 C 0.02802(17) 0.27922(17) 0.1287(3) 0.0601(10) Uani 1 1 d . . .
H16A H 0.0259 0.2905 0.201 0.072 Uiso 1 1 calc R . .
H16B H 0.0311 0.3122 0.0785 0.072 Uiso 1 1 calc R . .
C15 C -0.01014(15) 0.20869(15) 0.0989(3) 0.0419(7) Uani 1 1 d . . .
H15A H -0.0306 0.198 0.0303 0.05 Uiso 1 1 calc R . .
H15B H -0.0358 0.1763 0.1528 0.05 Uiso 1 1 calc R . .
C11 C 0.03801(15) 0.19810(16) 0.3546(2) 0.0418(7) Uani 1 1 d . . .
H11 H -0.0054 0.1615 0.3306 0.05 Uiso 1 1 calc R . .
C13 C 0.02654(18) 0.2443(2) 0.4222(3) 0.0592(10) Uani 1 1 d . . .
H13A H 0.0613 0.2911 0.4244 0.071 Uiso 1 1 calc R . .
H13B H -0.0189 0.2362 0.4281 0.071 Uiso 1 1 calc R . .
C12 C 0.04131(18) 0.19521(19) 0.4687(2) 0.0568(9) Uani 1 1 d . . .
H12A H 0.005 0.157 0.5038 0.068 Uiso 1 1 calc R . .
H12B H 0.0851 0.2118 0.5001 0.068 Uiso 1 1 calc R . .
C33 C 0.72621(16) 0.29124(16) 0.2490(3) 0.0447(12) Uani 1 1 d . B .
H33 H 0.7548 0.3375 0.2461 0.054 Uiso 1 1 calc R . .
C34 C 0.70128(16) 0.24893(18) 0.1656(3) 0.0501(9) Uani 1 1 d . B .
H34 H 0.7095 0.2612 0.0957 0.06 Uiso 1 1 calc R . .
C35 C 0.66206(14) 0.18531(15) 0.2034(3) 0.0416(9) Uani 1 1 d . B .
H35 H 0.6389 0.1466 0.1634 0.05 Uiso 1 1 calc R . .
C36 C 0.66252(14) 0.18816(17) 0.3084(3) 0.0431(8) Uani 1 1 d . B .
H36 H 0.64 0.1518 0.3533 0.052 Uiso 1 1 calc R . .
C37 C 0.70171(15) 0.25372(17) 0.3376(3) 0.0478(9) Uani 1 1 d . B .
H37 H 0.7102 0.2699 0.4057 0.057 Uiso 1 1 calc R . .
C38 C 0.7485(2) 0.11057(18) 0.1792(4) 0.0673(14) Uani 1 1 d . B .
H38 H 0.7199 0.097 0.1218 0.081 Uiso 1 1 calc R . .
C39 C 0.72946(17) 0.09799(15) 0.2800(5) 0.0607(12) Uani 1 1 d . B .
H39 H 0.6855 0.074 0.3043 0.073 Uiso 1 1 calc R . .
C40 C 0.7854(2) 0.12627(16) 0.3391(3) 0.0574(10) Uani 1 1 d . B .
H40 H 0.7866 0.1251 0.4116 0.069 Uiso 1 1 calc R . .
C41 C 0.83916(17) 0.15654(16) 0.2756(4) 0.0560(10) Uani 1 1 d . . .
H41 H 0.8838 0.1801 0.2967 0.067 Uiso 1 1 calc R . .
C42 C 0.8170(2) 0.14683(18) 0.1762(4) 0.0596(11) Uani 1 1 d . B .
H42 H 0.8435 0.162 0.1166 0.072 Uiso 1 1 calc R . .
C43 C 0.82990(14) 0.26799(14) 0.4043(3) 0.0398(7) Uani 1 1 d . B .
H43 H 0.8083 0.2437 0.4685 0.048 Uiso 1 1 calc R . .
C44 C 0.90288(17) 0.30754(17) 0.4075(3) 0.0604(10) Uani 1 1 d . . .
H44A H 0.9251 0.306 0.4708 0.072 Uiso 1 1 calc R . .
H44B H 0.9272 0.3113 0.3437 0.072 Uiso 1 1 calc R . .
C45 C 0.86442(15) 0.34158(14) 0.4117(3) 0.0444(8) Uani 1 1 d . . .
H45A H 0.8645 0.3664 0.3504 0.053 Uiso 1 1 calc R . .
H45B H 0.8625 0.3611 0.4777 0.053 Uiso 1 1 calc R . .
Zr2 Zr 0.440847(12) 0.551351(12) 0.26835(3) 0.02093(7) Uani 1 1 d . . .
Zr1 Zr 0.114445(10) 0.219908(10) 0.23329(2) 0.02211(7) Uani 1 1 d . . .
Zr3 Zr 0.776711(12) 0.218407(12) 0.25680(2) 0.02623(11) Uani 1 1 d D . .
C46 C 0.8555(2) 0.2865(2) 0.1511(4) 0.0430(12) Uani 0.66 1 d PDU B 1
H46 H 0.8979 0.2893 0.171 0.052 Uiso 0.66 1 calc PR B 1
C47 C 0.8534(3) 0.2922(3) 0.0382(4) 0.0594(15) Uani 0.66 1 d PDU B 1
H47A H 0.8893 0.2927 -0.0022 0.071 Uiso 0.66 1 calc PR B 1
H47B H 0.8098 0.2698 0.0046 0.071 Uiso 0.66 1 calc PR B 1
C48 C 0.8694(8) 0.3486(5) 0.1016(11) 0.077(4) Uani 0.66 1 d PDU B 1
H48A H 0.8359 0.3624 0.1082 0.092 Uiso 0.66 1 calc PR B 1
H48B H 0.9155 0.3852 0.1014 0.092 Uiso 0.66 1 calc PR B 1
C46' C 0.8293(5) 0.2731(4) 0.1029(9) 0.041(2) Uani 0.34 1 d PDU B 2
H46' H 0.8058 0.2485 0.0399 0.049 Uiso 0.34 1 calc PR B 2
C47' C 0.9028(5) 0.3130(5) 0.0906(10) 0.052(3) Uani 0.34 1 d PDU B 2
H47C H 0.9303 0.3188 0.1514 0.063 Uiso 0.34 1 calc PR B 2
H47D H 0.9218 0.3096 0.0249 0.063 Uiso 0.34 1 calc PR B 2
C48' C 0.8646(12) 0.3459(7) 0.0902(18) 0.045(4) Uani 0.34 1 d PDU B 2
H48C H 0.8595 0.3636 0.0243 0.054 Uiso 0.34 1 calc PR B 2
H48D H 0.868 0.3728 0.1507 0.054 Uiso 0.34 1 calc PR B 2
 
loop_
    _atom_site_aniso_label
    _atom_site_aniso_U_11
    _atom_site_aniso_U_22
    _atom_site_aniso_U_33
    _atom_site_aniso_U_23
    _atom_site_aniso_U_13
    _atom_site_aniso_U_12
C17 0.037(5) 0.027(4) 0.050(4) 0.001(3) -0.014(4) 0.022(4)
C18 0.036(4) 0.021(3) 0.049(4) 0.004(3) -0.003(3) 0.014(4)
C19 0.033(4) 0.021(3) 0.053(4) -0.010(3) -0.007(3) 0.016(3)
C20 0.039(4) 0.024(4) 0.050(4) -0.017(3) -0.011(3) 0.020(3)
C21 0.030(3) 0.030(3) 0.052(5) -0.014(4) -0.009(4) 0.023(3)
C17' 0.028(3) 0.020(3) 0.049(3) 0.007(2) -0.002(3) 0.015(3)
C18' 0.031(3) 0.016(2) 0.054(4) 0.000(3) -0.013(2) 0.014(3)
C19' 0.040(4) 0.023(3) 0.053(3) -0.014(3) -0.010(3) 0.020(3)
C20' 0.034(3) 0.033(3) 0.055(4) -0.013(3) -0.003(3) 0.024(3)
C21' 0.027(3) 0.029(3) 0.050(4) -0.008(3) -0.002(3) 0.023(2)
C23 0.0238(14) 0.0488(18) 0.061(2) 0.0149(16) 0.0088(14) 0.0212(13)
C24 0.0274(14) 0.0305(14) 0.063(3) -0.0081(15) -0.0161(15) 0.0176(12)
C25 0.0369(16) 0.0507(18) 0.039(2) 0.0047(15) -0.0025(14) 0.0317(15)
C26 0.0298(15) 0.0283(14) 0.071(3) 0.0028(14) -0.0030(14) 0.0215(12)
C22 0.0398(17) 0.065(2) 0.045(2) -0.0122(17) -0.0008(15) 0.0399(17)
C27 0.0345(15) 0.0404(16) 0.0324(15) 0.0052(12) 0.0062(12) 0.0191(13)
C28 0.063(2) 0.068(2) 0.0297(18) -0.0029(16) 0.0048(16) 0.0197(19)
C29 0.0470(18) 0.0366(16) 0.048(2) 0.0153(15) 0.0100(16) 0.0135(14)
C30 0.0265(13) 0.0222(13) 0.0384(17) -0.0010(11) -0.0011(12) 0.0067(11)
C31 0.0380(16) 0.0252(14) 0.042(2) -0.0033(13) -0.0006(14) 0.0086(12)
C32 0.0301(15) 0.0392(17) 0.049(2) -0.0060(14) -0.0122(14) 0.0098(13)
C2 0.0305(14) 0.0297(14) 0.0395(16) -0.0073(12) 0.0025(12) 0.0171(12)
C3 0.0405(16) 0.0284(14) 0.042(2) -0.0086(12) -0.0116(13) 0.0209(13)
C4 0.0519(18) 0.0229(13) 0.0484(18) 0.0111(14) 0.0165(17) 0.0198(13)
C5 0.0258(14) 0.0190(13) 0.0550(19) -0.0056(13) -0.0024(13) 0.0076(11)
C1 0.0390(15) 0.0299(14) 0.0355(16) -0.0133(12) -0.0083(12) 0.0192(12)
C8 0.0303(15) 0.0287(15) 0.065(2) -0.0094(15) -0.0142(15) 0.0095(12)
C7 0.0226(14) 0.0276(15) 0.064(3) -0.0035(17) 0.0050(16) -0.0033(12)
C6 0.0427(18) 0.0203(14) 0.074(3) 0.0096(16) -0.0142(19) 0.0007(13)
C10 0.0481(19) 0.0248(15) 0.104(3) -0.026(2) -0.015(2) 0.0179(14)
C9 0.0454(19) 0.049(2) 0.058(2) -0.0308(18) -0.0120(17) 0.0131(16)
C14 0.0361(15) 0.0373(16) 0.0363(17) 0.0006(13) -0.0029(12) 0.0190(13)
C16 0.069(2) 0.054(2) 0.073(3) -0.0075(19) -0.025(2) 0.0424(19)
C15 0.0371(16) 0.0497(18) 0.0397(18) -0.0039(15) -0.0072(13) 0.0222(15)
C11 0.0484(18) 0.0509(18) 0.0330(16) -0.0018(14) 0.0062(13) 0.0300(15)
C13 0.060(2) 0.090(3) 0.045(2) -0.017(2) 0.0044(18) 0.050(2)
C12 0.062(2) 0.083(3) 0.0326(17) -0.0001(17) 0.0083(15) 0.041(2)
C33 0.0389(17) 0.0309(15) 0.073(4) 0.0002(15) -0.0021(16) 0.0238(14)
C34 0.052(2) 0.072(2) 0.045(2) 0.0139(18) 0.0028(16) 0.0447(19)
C35 0.0322(15) 0.0431(17) 0.057(3) -0.0122(16) -0.0137(15) 0.0244(13)
C36 0.0272(14) 0.0517(19) 0.053(2) 0.0066(16) 0.0064(14) 0.0216(14)
C37 0.0416(18) 0.063(2) 0.054(3) -0.0192(19) -0.0041(16) 0.0380(17)
C38 0.086(3) 0.041(2) 0.094(4) -0.042(2) -0.053(3) 0.046(2)
C39 0.0391(18) 0.0188(14) 0.122(4) 0.003(2) -0.003(3) 0.0125(13)
C40 0.084(3) 0.0399(18) 0.066(3) 0.0028(17) -0.008(2) 0.044(2)
C41 0.0418(18) 0.0410(18) 0.100(3) -0.027(2) -0.024(2) 0.0316(15)
C42 0.078(3) 0.053(2) 0.069(3) -0.011(2) 0.009(2) 0.049(2)
C43 0.0360(16) 0.0352(15) 0.043(2) -0.0034(14) 0.0006(14) 0.0143(13)
C44 0.0445(19) 0.062(2) 0.065(3) -0.023(2) -0.0105(18) 0.0199(17)
C45 0.0431(18) 0.0359(16) 0.043(2) -0.0078(14) -0.0087(15) 0.0113(14)
Zr2 0.01966(11) 0.01629(11) 0.02843(13) -0.00003(11) -0.00018(11) 0.01019(8)
Zr1 0.01992(12) 0.01873(12) 0.02618(13) -0.00152(11) 0.00168(10) 0.00853(10)
Zr3 0.02094(13) 0.01794(13) 0.0394(3) -0.00241(10) 0.00018(10) 0.00938(10)
C46 0.028(2) 0.042(3) 0.037(3) 0.001(2) -0.005(2) 0.001(2)
C47 0.052(3) 0.060(3) 0.044(3) 0.008(3) 0.010(3) 0.011(3)
C48 0.085(8) 0.041(4) 0.087(9) 0.014(4) 0.025(7) 0.019(5)
C46' 0.040(5) 0.030(4) 0.048(7) -0.005(5) 0.010(5) 0.014(4)
C47' 0.047(5) 0.051(5) 0.061(7) 0.025(5) 0.031(5) 0.027(5)
C48' 0.058(9) 0.037(6) 0.043(8) 0.026(7) 0.011(7) 0.025(7)
 
 
#----------------------------------------------------------------------------#
#                   MOLECULAR GEOMETRY                                       #
#----------------------------------------------------------------------------#
 
_geom_special_details
;
 All esds (except the esd in the dihedral angle between two l.s. planes)
 are estimated using the full covariance matrix.  The cell esds are taken
 into account individually in the estimation of esds in distances, angles
 and torsion angles; correlations between esds in cell parameters are only
 used when they are defined by crystal symmetry.  An approximate (isotropic)
 treatment of cell esds is used for estimating esds involving l.s. planes.
;
loop_
    _geom_bond_atom_site_label_1
    _geom_bond_atom_site_label_2
    _geom_bond_distance
    _geom_bond_site_symmetry_2
    _geom_bond_publ_flag
C17 C21 1.406(11) . ?
C17 C18 1.412(11) . ?
C17 Zr2 2.527(13) . ?
C17 H17 0.95 . ?
C18 C19 1.424(12) . ?
C18 Zr2 2.53(2) . ?
C18 H18 0.95 . ?
C19 C20 1.402(12) . ?
C19 Zr2 2.50(3) . ?
C19 H19 0.95 . ?
C20 C21 1.385(11) . ?
C20 Zr2 2.566(17) . ?
C20 H20 0.95 . ?
C21 Zr2 2.578(13) . ?
C21 H21 0.95 . ?
C17' C21' 1.412(8) . ?
C17' C18' 1.416(8) . ?
C17' Zr2 2.534(9) . ?
C17' H17' 0.95 . ?
C18' C19' 1.423(10) . ?
C18' Zr2 2.491(14) . ?
C18' H18' 0.95 . ?
C19' C20' 1.397(9) . ?
C19' Zr2 2.507(19) . ?
C19' H19' 0.95 . ?
C20' C21' 1.399(10) . ?
C20' Zr2 2.499(12) . ?
C20' H20' 0.95 . ?
C21' Zr2 2.521(8) . ?
C21' H21' 0.95 . ?
C23 C22 1.399(5) . ?
C23 C24 1.408(6) . ?
C23 Zr2 2.510(3) . ?
C23 H23 0.95 . ?
C24 C25 1.401(4) . ?
C24 Zr2 2.514(3) . ?
C24 H24 0.95 . ?
C25 C26 1.380(4) . ?
C25 Zr2 2.523(3) . ?
C25 H25 0.95 . ?
C26 C22 1.400(5) . ?
C26 Zr2 2.530(3) . ?
C26 H26 0.95 . ?
C22 Zr2 2.519(3) . ?
C22 H22 0.95 . ?
C27 C28 1.497(4) . ?
C27 C29 1.520(4) . ?
C27 Zr2 2.246(3) . ?
C27 H27 1 . ?
C28 C29 1.479(5) . ?
C28 H28A 0.99 . ?
C28 H28B 0.99 . ?
C29 H29A 0.99 . ?
C29 H29B 0.99 . ?
C30 C31 1.514(4) . ?
C30 C32 1.530(4) . ?
C30 Zr2 2.267(3) . ?
C30 H30 1 . ?
C31 C32 1.499(4) . ?
C31 H31A 0.99 . ?
C31 H31B 0.99 . ?
C32 H32A 0.99 . ?
C32 H32B 0.99 . ?
C2 C3 1.395(4) . ?
C2 C1 1.399(4) . ?
C2 Zr1 2.516(3) . ?
C2 H2 0.95 . ?
C3 C4 1.413(4) . ?
C3 Zr1 2.496(3) . ?
C3 H3 0.95 . ?
C4 C5 1.389(5) . ?
C4 Zr1 2.520(3) . ?
C4 H4 0.95 . ?
C5 C1 1.398(4) . ?
C5 Zr1 2.524(3) . ?
C5 H5 0.95 . ?
C1 Zr1 2.538(3) . ?
C1 H1 0.95 . ?
C8 C9 1.391(5) . ?
C8 C7 1.399(6) . ?
C8 Zr1 2.503(3) . ?
C8 H8 0.95 . ?
C7 C6 1.393(5) . ?
C7 Zr1 2.503(3) . ?
C7 H7 0.95 . ?
C6 C10 1.389(6) . ?
C6 Zr1 2.523(3) . ?
C6 H6 0.95 . ?
C10 C9 1.393(6) . ?
C10 Zr1 2.536(3) . ?
C10 H10 0.95 . ?
C9 Zr1 2.527(3) . ?
C9 H9 0.95 . ?
C14 C16 1.517(4) . ?
C14 C15 1.524(4) . ?
C14 Zr1 2.261(3) . ?
C14 H14 1 . ?
C16 C15 1.488(4) . ?
C16 H16A 0.99 . ?
C16 H16B 0.99 . ?
C15 H15A 0.99 . ?
C15 H15B 0.99 . ?
C11 C12 1.498(4) . ?
C11 C13 1.525(4) . ?
C11 Zr1 2.256(3) . ?
C11 H11 1 . ?
C13 C12 1.489(5) . ?
C13 H13A 0.99 . ?
C13 H13B 0.99 . ?
C12 H12A 0.99 . ?
C12 H12B 0.99 . ?
C33 C34 1.393(5) . ?
C33 C37 1.394(5) . ?
C33 Zr3 2.524(3) . ?
C33 H33 0.95 . ?
C34 C35 1.396(5) . ?
C34 Zr3 2.519(3) . ?
C34 H34 0.95 . ?
C35 C36 1.376(6) . ?
C35 Zr3 2.500(3) . ?
C35 H35 0.95 . ?
C36 C37 1.395(5) . ?
C36 Zr3 2.499(3) . ?
C36 H36 0.95 . ?
C37 Zr3 2.524(3) . ?
C37 H37 0.95 . ?
C38 C39 1.376(7) . ?
C38 C42 1.395(6) . ?
C38 Zr3 2.491(3) . ?
C38 H38 0.95 . ?
C39 C40 1.376(6) . ?
C39 Zr3 2.486(3) . ?
C39 H39 0.95 . ?
C40 C41 1.377(6) . ?
C40 Zr3 2.515(3) . ?
C40 H40 0.95 . ?
C41 C42 1.377(6) . ?
C41 Zr3 2.540(3) . ?
C41 H41 0.95 . ?
C42 Zr3 2.535(3) . ?
C42 H42 0.95 . ?
C43 C44 1.486(4) . ?
C43 C45 1.501(4) . ?
C43 Zr3 2.278(3) . ?
C43 H43 1 . ?
C44 C45 1.476(5) . ?
C44 H44A 0.99 . ?
C44 H44B 0.99 . ?
C45 H45A 0.99 . ?
C45 H45B 0.99 . ?
Zr3 C46 2.222(5) . ?
Zr3 C46' 2.376(10) . ?
C46 C48 1.477(9) . ?
C46 C47 1.487(7) . ?
C46 H46 1 . ?
C47 C48 1.446(12) . ?
C47 H47A 0.99 . ?
C47 H47B 0.99 . ?
C48 H48A 0.99 . ?
C48 H48B 0.99 . ?
C46' C48' 1.490(14) . ?
C46' C47' 1.506(11) . ?
C46' H46' 1 . ?
C47' C48' 1.447(17) . ?
C47' H47C 0.99 . ?
C47' H47D 0.99 . ?
C48' H48C 0.99 . ?
C48' H48D 0.99 . ?
 
loop_
    _geom_angle_atom_site_label_1
    _geom_angle_atom_site_label_2
    _geom_angle_atom_site_label_3
    _geom_angle
    _geom_angle_site_symmetry_1
    _geom_angle_site_symmetry_3
    _geom_angle_publ_flag
C21 C17 C18 108.9(9) . . ?
C21 C17 Zr2 76.0(7) . . ?
C18 C17 Zr2 74.0(10) . . ?
C21 C17 H17 125.5 . . ?
C18 C17 H17 125.5 . . ?
Zr2 C17 H17 116.4 . . ?
C17 C18 C19 106.6(10) . . ?
C17 C18 Zr2 73.6(9) . . ?
C19 C18 Zr2 72.4(14) . . ?
C17 C18 H18 126.7 . . ?
C19 C18 H18 126.7 . . ?
Zr2 C18 H18 119.3 . . ?
C20 C19 C18 107.5(11) . . ?
C20 C19 Zr2 76.4(11) . . ?
C18 C19 Zr2 74.7(14) . . ?
C20 C19 H19 126.3 . . ?
C18 C19 H19 126.3 . . ?
Zr2 C19 H19 114.9 . . ?
C21 C20 C19 109.5(11) . . ?
C21 C20 Zr2 74.9(8) . . ?
C19 C20 Zr2 71.5(12) . . ?
C21 C20 H20 125.3 . . ?
C19 C20 H20 125.3 . . ?
Zr2 C20 H20 120.1 . . ?
C20 C21 C17 107.4(9) . . ?
C20 C21 Zr2 73.9(9) . . ?
C17 C21 Zr2 72.0(7) . . ?
C20 C21 H21 126.3 . . ?
C17 C21 H21 126.3 . . ?
Zr2 C21 H21 119.7 . . ?
C21' C17' C18' 107.9(7) . . ?
C21' C17' Zr2 73.3(5) . . ?
C18' C17' Zr2 72.0(7) . . ?
C21' C17' H17' 126.1 . . ?
C18' C17' H17' 126.1 . . ?
Zr2 C17' H17' 120.5 . . ?
C17' C18' C19' 107.2(8) . . ?
C17' C18' Zr2 75.3(6) . . ?
C19' C18' Zr2 74.1(10) . . ?
C17' C18' H18' 126.4 . . ?
C19' C18' H18' 126.4 . . ?
Zr2 C18' H18' 116.4 . . ?
C20' C19' C18' 108.0(8) . . ?
C20' C19' Zr2 73.5(8) . . ?
C18' C19' Zr2 72.8(10) . . ?
C20' C19' H19' 126 . . ?
C18' C19' H19' 126 . . ?
Zr2 C19' H19' 119.5 . . ?
C19' C20' C21' 108.7(7) . . ?
C19' C20' Zr2 74.1(9) . . ?
C21' C20' Zr2 74.7(5) . . ?
C19' C20' H20' 125.6 . . ?
C21' C20' H20' 125.6 . . ?
Zr2 C20' H20' 117.5 . . ?
C20' C21' C17' 108.0(6) . . ?
C20' C21' Zr2 73.0(6) . . ?
C17' C21' Zr2 74.3(5) . . ?
C20' C21' H21' 126 . . ?
C17' C21' H21' 126 . . ?
Zr2 C21' H21' 118.7 . . ?
C22 C23 C24 107.5(3) . . ?
C22 C23 Zr2 74.20(16) . . ?
C24 C23 Zr2 73.90(18) . . ?
C22 C23 H23 126.2 . . ?
C24 C23 H23 126.2 . . ?
Zr2 C23 H23 117.7 . . ?
C25 C24 C23 107.7(3) . . ?
C25 C24 Zr2 74.20(16) . . ?
C23 C24 Zr2 73.56(17) . . ?
C25 C24 H24 126.2 . . ?
C23 C24 H24 126.2 . . ?
Zr2 C24 H24 118.1 . . ?
C26 C25 C24 108.5(3) . . ?
C26 C25 Zr2 74.43(17) . . ?
C24 C25 Zr2 73.50(16) . . ?
C26 C25 H25 125.8 . . ?
C24 C25 H25 125.8 . . ?
Zr2 C25 H25 118.2 . . ?
C25 C26 C22 108.3(3) . . ?
C25 C26 Zr2 73.86(16) . . ?
C22 C26 Zr2 73.46(17) . . ?
C25 C26 H26 125.9 . . ?
C22 C26 H26 125.9 . . ?
Zr2 C26 H26 118.7 . . ?
C23 C22 C26 108.1(3) . . ?
C23 C22 Zr2 73.49(17) . . ?
C26 C22 Zr2 74.34(17) . . ?
C23 C22 H22 126 . . ?
C26 C22 H22 126 . . ?
Zr2 C22 H22 118.1 . . ?
C28 C27 C29 58.7(2) . . ?
C28 C27 Zr2 130.9(2) . . ?
C29 C27 Zr2 132.3(2) . . ?
C28 C27 H27 108.8 . . ?
C29 C27 H27 108.8 . . ?
Zr2 C27 H27 108.8 . . ?
C29 C28 C27 61.4(2) . . ?
C29 C28 H28A 117.6 . . ?
C27 C28 H28A 117.6 . . ?
C29 C28 H28B 117.6 . . ?
C27 C28 H28B 117.6 . . ?
H28A C28 H28B 114.7 . . ?
C28 C29 C27 59.9(2) . . ?
C28 C29 H29A 117.8 . . ?
C27 C29 H29A 117.8 . . ?
C28 C29 H29B 117.8 . . ?
C27 C29 H29B 117.8 . . ?
H29A C29 H29B 114.9 . . ?
C31 C30 C32 59.00(18) . . ?
C31 C30 Zr2 117.6(2) . . ?
C32 C30 Zr2 120.6(2) . . ?
C31 C30 H30 115.9 . . ?
C32 C30 H30 115.9 . . ?
Zr2 C30 H30 115.9 . . ?
C32 C31 C30 61.02(18) . . ?
C32 C31 H31A 117.7 . . ?
C30 C31 H31A 117.7 . . ?
C32 C31 H31B 117.7 . . ?
C30 C31 H31B 117.7 . . ?
H31A C31 H31B 114.8 . . ?
C31 C32 C30 59.98(18) . . ?
C31 C32 H32A 117.8 . . ?
C30 C32 H32A 117.8 . . ?
C31 C32 H32B 117.8 . . ?
C30 C32 H32B 117.8 . . ?
H32A C32 H32B 114.9 . . ?
C3 C2 C1 108.0(3) . . ?
C3 C2 Zr1 73.07(17) . . ?
C1 C2 Zr1 74.79(15) . . ?
C3 C2 H2 126 . . ?
C1 C2 H2 126 . . ?
Zr1 C2 H2 118.1 . . ?
C2 C3 C4 108.2(3) . . ?
C2 C3 Zr1 74.62(17) . . ?
C4 C3 Zr1 74.57(16) . . ?
C2 C3 H3 125.9 . . ?
C4 C3 H3 125.9 . . ?
Zr1 C3 H3 116.9 . . ?
C5 C4 C3 107.1(3) . . ?
C5 C4 Zr1 74.15(16) . . ?
C3 C4 Zr1 72.70(15) . . ?
C5 C4 H4 126.4 . . ?
C3 C4 H4 126.4 . . ?
Zr1 C4 H4 118.7 . . ?
C4 C5 C1 109.0(2) . . ?
C4 C5 Zr1 73.89(16) . . ?
C1 C5 Zr1 74.52(14) . . ?
C4 C5 H5 125.5 . . ?
C1 C5 H5 125.5 . . ?
Zr1 C5 H5 117.9 . . ?
C5 C1 C2 107.7(3) . . ?
C5 C1 Zr1 73.41(15) . . ?
C2 C1 Zr1 73.08(15) . . ?
C5 C1 H1 126.2 . . ?
C2 C1 H1 126.2 . . ?
Zr1 C1 H1 119.2 . . ?
C9 C8 C7 107.3(3) . . ?
C9 C8 Zr1 74.92(18) . . ?
C7 C8 Zr1 73.78(18) . . ?
C9 C8 H8 126.4 . . ?
C7 C8 H8 126.4 . . ?
Zr1 C8 H8 117.1 . . ?
C6 C7 C8 108.4(4) . . ?
C6 C7 Zr1 74.70(17) . . ?
C8 C7 Zr1 73.75(17) . . ?
C6 C7 H7 125.8 . . ?
C8 C7 H7 125.8 . . ?
Zr1 C7 H7 117.7 . . ?
C10 C6 C7 107.9(4) . . ?
C10 C6 Zr1 74.59(19) . . ?
C7 C6 Zr1 73.12(16) . . ?
C10 C6 H6 126.1 . . ?
C7 C6 H6 126.1 . . ?
Zr1 C6 H6 118.2 . . ?
C6 C10 C9 108.0(3) . . ?
C6 C10 Zr1 73.53(18) . . ?
C9 C10 Zr1 73.68(18) . . ?
C6 C10 H10 126 . . ?
C9 C10 H10 126 . . ?
Zr1 C10 H10 118.7 . . ?
C8 C9 C10 108.5(4) . . ?
C8 C9 Zr1 72.96(18) . . ?
C10 C9 Zr1 74.38(19) . . ?
C8 C9 H9 125.8 . . ?
C10 C9 H9 125.8 . . ?
Zr1 C9 H9 118.8 . . ?
C16 C14 C15 58.6(2) . . ?
C16 C14 Zr1 119.2(2) . . ?
C15 C14 Zr1 120.7(2) . . ?
C16 C14 H14 115.5 . . ?
C15 C14 H14 115.5 . . ?
Zr1 C14 H14 115.5 . . ?
C15 C16 C14 60.9(2) . . ?
C15 C16 H16A 117.7 . . ?
C14 C16 H16A 117.7 . . ?
C15 C16 H16B 117.7 . . ?
C14 C16 H16B 117.7 . . ?
H16A C16 H16B 114.8 . . ?
C16 C15 C14 60.5(2) . . ?
C16 C15 H15A 117.7 . . ?
C14 C15 H15A 117.7 . . ?
C16 C15 H15B 117.7 . . ?
C14 C15 H15B 117.7 . . ?
H15A C15 H15B 114.8 . . ?
C12 C11 C13 59.0(2) . . ?
C12 C11 Zr1 131.2(2) . . ?
C13 C11 Zr1 130.6(2) . . ?
C12 C11 H11 109.1 . . ?
C13 C11 H11 109.1 . . ?
Zr1 C11 H11 109.1 . . ?
C12 C13 C11 59.6(2) . . ?
C12 C13 H13A 117.8 . . ?
C11 C13 H13A 117.8 . . ?
C12 C13 H13B 117.8 . . ?
C11 C13 H13B 117.8 . . ?
H13A C13 H13B 114.9 . . ?
C13 C12 C11 61.4(2) . . ?
C13 C12 H12A 117.6 . . ?
C11 C12 H12A 117.6 . . ?
C13 C12 H12B 117.6 . . ?
C11 C12 H12B 117.6 . . ?
H12A C12 H12B 114.7 . . ?
C34 C33 C37 107.9(3) . . ?
C34 C33 Zr3 73.78(18) . . ?
C37 C33 Zr3 73.95(18) . . ?
C34 C33 H33 126 . . ?
C37 C33 H33 126 . . ?
Zr3 C33 H33 118.2 . . ?
C33 C34 C35 107.6(3) . . ?
C33 C34 Zr3 74.14(19) . . ?
C35 C34 Zr3 73.08(17) . . ?
C33 C34 H34 126.2 . . ?
C35 C34 H34 126.2 . . ?
Zr3 C34 H34 118.5 . . ?
C36 C35 C34 108.5(3) . . ?
C36 C35 Zr3 74.01(18) . . ?
C34 C35 Zr3 74.62(17) . . ?
C36 C35 H35 125.7 . . ?
C34 C35 H35 125.7 . . ?
Zr3 C35 H35 117.6 . . ?
C35 C36 C37 108.2(3) . . ?
C35 C36 Zr3 74.03(18) . . ?
C37 C36 Zr3 74.83(17) . . ?
C35 C36 H36 125.9 . . ?
C37 C36 H36 125.9 . . ?
Zr3 C36 H36 117.2 . . ?
C33 C37 C36 107.8(3) . . ?
C33 C37 Zr3 73.97(19) . . ?
C36 C37 Zr3 72.92(18) . . ?
C33 C37 H37 126.1 . . ?
C36 C37 H37 126.1 . . ?
Zr3 C37 H37 118.9 . . ?
C39 C38 C42 108.0(4) . . ?
C39 C38 Zr3 73.8(2) . . ?
C42 C38 Zr3 75.61(19) . . ?
C39 C38 H38 126 . . ?
C42 C38 H38 126 . . ?
Zr3 C38 H38 116.7 . . ?
C40 C39 C38 107.9(4) . . ?
C40 C39 Zr3 75.17(18) . . ?
C38 C39 Zr3 74.1(2) . . ?
C40 C39 H39 126.1 . . ?
C38 C39 H39 126.1 . . ?
Zr3 C39 H39 116.7 . . ?
C39 C40 C41 108.5(4) . . ?
C39 C40 Zr3 72.90(19) . . ?
C41 C40 Zr3 75.2(2) . . ?
C39 C40 H40 125.8 . . ?
C41 C40 H40 125.8 . . ?
Zr3 C40 H40 118 . . ?
C40 C41 C42 108.2(3) . . ?
C40 C41 Zr3 73.19(18) . . ?
C42 C41 Zr3 74.0(2) . . ?
C40 C41 H41 125.9 . . ?
C42 C41 H41 125.9 . . ?
Zr3 C41 H41 118.8 . . ?
C41 C42 C38 107.4(4) . . ?
C41 C42 Zr3 74.5(2) . . ?
C38 C42 Zr3 72.17(19) . . ?
C41 C42 H42 126.3 . . ?
C38 C42 H42 126.3 . . ?
Zr3 C42 H42 119 . . ?
C44 C43 C45 59.2(2) . . ?
C44 C43 Zr3 120.6(3) . . ?
C45 C43 Zr3 119.1(2) . . ?
C44 C43 H43 115.4 . . ?
C45 C43 H43 115.4 . . ?
Zr3 C43 H43 115.4 . . ?
C45 C44 C43 60.9(2) . . ?
C45 C44 H44A 117.7 . . ?
C43 C44 H44A 117.7 . . ?
C45 C44 H44B 117.7 . . ?
C43 C44 H44B 117.7 . . ?
H44A C44 H44B 114.8 . . ?
C44 C45 C43 59.9(2) . . ?
C44 C45 H45A 117.8 . . ?
C43 C45 H45A 117.8 . . ?
C44 C45 H45B 117.8 . . ?
C43 C45 H45B 117.8 . . ?
H45A C45 H45B 114.9 . . ?
C27 Zr2 C30 97.16(10) . . ?
C27 Zr2 C18' 131.1(3) . . ?
C30 Zr2 C18' 109.5(2) . . ?
C27 Zr2 C20' 77.9(2) . . ?
C30 Zr2 C20' 112.3(2) . . ?
C18' Zr2 C20' 54.4(3) . . ?
C27 Zr2 C19 105.7(3) . . ?
C30 Zr2 C19 132.4(4) . . ?
C18' Zr2 C19 28.2(5) . . ?
C20' Zr2 C19 38.2(4) . . ?
C27 Zr2 C19' 99.7(2) . . ?
C30 Zr2 C19' 132.6(3) . . ?
C18' Zr2 C19' 33.1(3) . . ?
C20' Zr2 C19' 32.4(2) . . ?
C19 Zr2 C19' 6.5(5) . . ?
C27 Zr2 C23 137.03(11) . . ?
C30 Zr2 C23 99.78(12) . . ?
C18' Zr2 C23 78.6(3) . . ?
C20' Zr2 C23 129.2(2) . . ?
C19 Zr2 C23 91.2(4) . . ?
C19' Zr2 C23 97.3(2) . . ?
C27 Zr2 C24 112.01(11) . . ?
C30 Zr2 C24 130.00(11) . . ?
C18' Zr2 C24 81.2(2) . . ?
C20' Zr2 C24 112.99(19) . . ?
C19 Zr2 C24 78.4(4) . . ?
C19' Zr2 C24 82.7(3) . . ?
C23 Zr2 C24 32.54(13) . . ?
C27 Zr2 C22 117.80(11) . . ?
C30 Zr2 C22 77.32(11) . . ?
C18' Zr2 C22 107.9(3) . . ?
C20' Zr2 C22 161.4(2) . . ?
C19 Zr2 C22 123.5(4) . . ?
C19' Zr2 C22 129.6(2) . . ?
C23 Zr2 C22 32.31(11) . . ?
C24 Zr2 C22 53.46(11) . . ?
C27 Zr2 C21' 91.9(2) . . ?
C30 Zr2 C21' 81.78(19) . . ?
C18' Zr2 C21' 54.3(3) . . ?
C20' Zr2 C21' 32.4(2) . . ?
C19 Zr2 C21' 56.8(5) . . ?
C19' Zr2 C21' 53.7(3) . . ?
C23 Zr2 C21' 129.4(2) . . ?
C24 Zr2 C21' 133.79(18) . . ?
C22 Zr2 C21' 145.3(2) . . ?
C27 Zr2 C25 84.11(10) . . ?
C30 Zr2 C25 122.35(10) . . ?
C18' Zr2 C25 112.1(2) . . ?
C20' Zr2 C25 124.1(2) . . ?
C19 Zr2 C25 101.4(4) . . ?
C19' Zr2 C25 103.3(3) . . ?
C23 Zr2 C25 53.55(11) . . ?
C24 Zr2 C25 32.30(10) . . ?
C22 Zr2 C25 53.10(13) . . ?
C21' Zr2 C25 155.82(19) . . ?
C27 Zr2 C17 112.9(3) . . ?
C30 Zr2 C17 79.1(3) . . ?
C18' Zr2 C17 40.0(3) . . ?
C20' Zr2 C17 45.8(3) . . ?
C19 Zr2 C17 53.7(5) . . ?
C19' Zr2 C17 53.5(4) . . ?
C23 Zr2 C17 109.0(3) . . ?
C24 Zr2 C17 120.8(3) . . ?
C22 Zr2 C17 126.0(3) . . ?
C21' Zr2 C17 21.0(3) . . ?
C25 Zr2 C17 152.0(3) . . ?
C11 Zr1 C14 97.45(11) . . ?
C11 Zr1 C3 102.75(11) . . ?
C14 Zr1 C3 132.64(10) . . ?
C11 Zr1 C8 108.72(12) . . ?
C14 Zr1 C8 131.33(11) . . ?
C3 Zr1 C8 81.05(10) . . ?
C11 Zr1 C7 136.40(13) . . ?
C14 Zr1 C7 102.99(12) . . ?
C3 Zr1 C7 91.03(10) . . ?
C8 Zr1 C7 32.46(13) . . ?
C11 Zr1 C2 130.19(10) . . ?
C14 Zr1 C2 105.42(11) . . ?
C3 Zr1 C2 32.31(10) . . ?
C8 Zr1 C2 88.26(10) . . ?
C7 Zr1 C2 80.38(10) . . ?
C11 Zr1 C4 76.51(11) . . ?
C14 Zr1 C4 118.06(11) . . ?
C3 Zr1 C4 32.73(10) . . ?
C8 Zr1 C4 107.75(11) . . ?
C7 Zr1 C4 123.65(10) . . ?
C2 Zr1 C4 53.69(10) . . ?
C11 Zr1 C6 121.80(13) . . ?
C14 Zr1 C6 77.82(11) . . ?
C3 Zr1 C6 122.99(11) . . ?
C8 Zr1 C6 53.55(12) . . ?
C7 Zr1 C6 32.18(11) . . ?
C2 Zr1 C6 106.16(12) . . ?
C4 Zr1 C6 155.72(11) . . ?
C11 Zr1 C5 85.46(11) . . ?
C14 Zr1 C5 86.69(10) . . ?
C3 Zr1 C5 53.37(10) . . ?
C8 Zr1 C5 134.40(10) . . ?
C7 Zr1 C5 133.33(10) . . ?
C2 Zr1 C5 53.23(9) . . ?
C4 Zr1 C5 31.96(11) . . ?
C6 Zr1 C5 149.87(13) . . ?
C11 Zr1 C9 83.34(12) . . ?
C14 Zr1 C9 118.93(12) . . ?
C3 Zr1 C9 105.74(11) . . ?
C8 Zr1 C9 32.11(11) . . ?
C7 Zr1 C9 53.06(12) . . ?
C2 Zr1 C9 120.01(11) . . ?
C4 Zr1 C9 121.26(14) . . ?
C6 Zr1 C9 52.94(13) . . ?
C5 Zr1 C9 153.13(13) . . ?
C11 Zr1 C10 90.61(13) . . ?
C14 Zr1 C10 87.20(13) . . ?
C3 Zr1 C10 134.23(11) . . ?
C8 Zr1 C10 53.28(11) . . ?
C7 Zr1 C10 53.00(12) . . ?
C2 Zr1 C10 133.38(11) . . ?
C4 Zr1 C10 152.61(15) . . ?
C6 Zr1 C10 31.88(14) . . ?
C5 Zr1 C10 172.25(10) . . ?
C9 Zr1 C10 31.94(13) . . ?
C11 Zr1 C1 117.25(10) . . ?
C14 Zr1 C1 79.29(10) . . ?
C3 Zr1 C1 53.36(9) . . ?
C8 Zr1 C1 119.79(10) . . ?
C7 Zr1 C1 104.25(11) . . ?
C2 Zr1 C1 32.13(9) . . ?
C4 Zr1 C1 53.29(11) . . ?
C6 Zr1 C1 118.52(13) . . ?
C5 Zr1 C1 32.06(10) . . ?
C9 Zr1 C1 151.88(10) . . ?
C10 Zr1 C1 150.20(14) . . ?
C46 Zr3 C43 96.52(16) . . ?
C46 Zr3 C46' 20.3(2) . . ?
C43 Zr3 C46' 116.0(3) . . ?
C46 Zr3 C39 129.20(18) . . ?
C43 Zr3 C39 107.26(15) . . ?
C46' Zr3 C39 122.3(3) . . ?
C46 Zr3 C38 100.4(2) . . ?
C43 Zr3 C38 131.63(13) . . ?
C46' Zr3 C38 90.4(3) . . ?
C39 Zr3 C38 32.11(16) . . ?
C46 Zr3 C36 139.63(17) . . ?
C43 Zr3 C36 98.76(12) . . ?
C46' Zr3 C36 125.2(3) . . ?
C39 Zr3 C36 80.71(12) . . ?
C38 Zr3 C36 96.83(14) . . ?
C46 Zr3 C35 115.44(17) . . ?
C43 Zr3 C35 128.75(11) . . ?
C46' Zr3 C35 96.8(3) . . ?
C39 Zr3 C35 83.20(11) . . ?
C38 Zr3 C35 82.66(11) . . ?
C36 Zr3 C35 31.95(13) . . ?
C46 Zr3 C40 119.33(18) . . ?
C43 Zr3 C40 79.45(12) . . ?
C46' Zr3 C40 125.8(2) . . ?
C39 Zr3 C40 31.92(13) . . ?
C38 Zr3 C40 52.77(15) . . ?
C36 Zr3 C40 100.15(12) . . ?
C35 Zr3 C40 112.96(12) . . ?
C46 Zr3 C34 87.19(16) . . ?
C43 Zr3 C34 122.70(12) . . ?
C46' Zr3 C34 72.2(3) . . ?
C39 Zr3 C34 113.83(13) . . ?
C38 Zr3 C34 103.21(12) . . ?
C36 Zr3 C34 53.27(12) . . ?
C35 Zr3 C34 32.31(11) . . ?
C40 Zr3 C34 144.95(12) . . ?
C46 Zr3 C37 119.43(17) . . ?
C43 Zr3 C37 76.78(11) . . ?
C46' Zr3 C37 115.9(2) . . ?
C39 Zr3 C37 109.55(13) . . ?
C38 Zr3 C37 129.07(14) . . ?
C36 Zr3 C37 32.24(10) . . ?
C35 Zr3 C37 53.07(11) . . ?
C40 Zr3 C37 118.22(14) . . ?
C34 Zr3 C37 53.11(15) . . ?
C46 Zr3 C33 89.51(16) . . ?
C43 Zr3 C33 90.64(11) . . ?
C46' Zr3 C33 83.8(2) . . ?
C39 Zr3 C33 132.99(11) . . ?
C38 Zr3 C33 134.11(12) . . ?
C36 Zr3 C33 53.32(11) . . ?
C35 Zr3 C33 53.24(10) . . ?
C40 Zr3 C33 150.20(13) . . ?
C34 Zr3 C33 32.08(11) . . ?
C37 Zr3 C33 32.08(11) . . ?
C46 Zr3 C42 76.44(17) . . ?
C43 Zr3 C42 113.60(13) . . ?
C46' Zr3 C42 75.0(2) . . ?
C39 Zr3 C42 53.05(15) . . ?
C38 Zr3 C42 32.22(13) . . ?
C36 Zr3 C42 128.86(13) . . ?
C35 Zr3 C42 112.26(12) . . ?
C40 Zr3 C42 52.43(15) . . ?
C34 Zr3 C42 122.71(14) . . ?
C37 Zr3 C42 161.03(13) . . ?
C33 Zr3 C42 152.93(14) . . ?
C48 C46 C47 58.4(6) . . ?
C48 C46 Zr3 132.6(7) . . ?
C47 C46 Zr3 129.1(4) . . ?
C48 C46 H46 109.2 . . ?
C47 C46 H46 109.2 . . ?
Zr3 C46 H46 109.2 . . ?
C48 C47 C46 60.4(5) . . ?
C48 C47 H47A 117.7 . . ?
C46 C47 H47A 117.7 . . ?
C48 C47 H47B 117.7 . . ?
C46 C47 H47B 117.7 . . ?
H47A C47 H47B 114.8 . . ?
C47 C48 C46 61.2(4) . . ?
C47 C48 H48A 117.7 . . ?
C46 C48 H48A 117.7 . . ?
C47 C48 H48B 117.6 . . ?
C46 C48 H48B 117.6 . . ?
H48A C48 H48B 114.8 . . ?
C48' C46' C47' 57.7(9) . . ?
C48' C46' Zr3 123.8(10) . . ?
C47' C46' Zr3 123.5(9) . . ?
C48' C46' H46' 113.6 . . ?
C47' C46' H46' 113.6 . . ?
Zr3 C46' H46' 113.6 . . ?
C48' C47' C46' 60.6(8) . . ?
C48' C47' H47C 117.7 . . ?
C46' C47' H47C 117.7 . . ?
C48' C47' H47D 117.7 . . ?
C46' C47' H47D 117.7 . . ?
H47C C47' H47D 114.8 . . ?
C47' C48' C46' 61.7(6) . . ?
C47' C48' H48C 117.6 . . ?
C46' C48' H48C 117.6 . . ?
C47' C48' H48D 117.6 . . ?
C46' C48' H48D 117.6 . . ?
H48C C48' H48D 114.7 . . ?
 
# The following lines are used to test the character set of files sent by
# network email or other means. They are not part of the CIF data set
# abcdefghijklmnopqrstuvwxyzABCDEFGHIJKLMNOPQRSTUVWXYZ0123456789
# !@#$%^&*()_+{}:"~<>?|\-=[];'`,./
 
# END of CIF
